# Supplementary material for: Determinants of Adoption of Improved Dairy Technologies: The Case of Offa Woreda, Wolaita Zone, Southern Ethiopia
Source: Hindawi journal article supplement (doi:10.1155/2022/3947794), 2022-07-14
Supplement: f1 [file 3947794.f1.docx]

Supplementary Material: 1

Table 9: Contingency Coefficient for the Dummy Variables of Binary Logit Regression

| Contingencies of Dummy Variables | SEX | OFF FAR - | LABOR | MOBTEC | CREDIT | ACCEXT | PERCT |
| --- | --- | --- | --- | --- | --- | --- | --- |
| SEX | **1** | **.040** | -.062 | -.033 | -.036 | -.107 | -.119 |
| OFF-FAR |  | **1** | -.164 | -.339 | .127 | .193 | .177 |
| LABOR |  |  | **1** | .130 | -.206 | -.177 | .033 |
| MOBTEC |  |  |  | **1** | -.413 | -.078 | -.021 |
| CREDIT |  |  |  |  | **1** | .263 | .224 |
| ACCEXT |  |  |  |  |  | **1** | .167 |
| PERCT |  |  |  |  |  |  | **1** |

Source: Model output.

Table 10: Variance Inflation Factor (VIF) for the continuous Explanatory variables

| **No.** | **Continuous Variables** | **Tolerance** | **Variance inflation factor (VIF)** |
| --- | --- | --- | --- |
|  | Age of HHHs | 0.89 | 1.114 |
|  | Land holding HHHs | 0.935 | 1.07 |
|  | Livestock holding HHHs | 1 | 1 |
|  | Farm income HHHs | 0.93 | 1.07 |
|  | Distance to nearest market | 1 | 1 |
|  | Education level HHHs | 0.89 | 1.224 |
|  | Dairy farming experience HHHs | 0.93 | 1.07 |

Source: Own survey, 2019.
